# Supplementary material
Source: PubMed Central journal article supplement (PMC3264283)
Supplement: supp_56.2.1142_TableS1.pdf [file supp_56.2.1142_TableS1.pdf]

SUPPLEMENTARY TABLE S1. Resistance profiles and genotypes of investigated clinical isolates of *M. tuberculosis*

| Strain                                                                                        | INH<br>(0.1 µg/ml) |              |             | RIF<br>(1.0 µg/ml) |                  | ETH<br>(2.5 µg/ml) |                                                |
|-----------------------------------------------------------------------------------------------|--------------------|--------------|-------------|--------------------|------------------|--------------------|------------------------------------------------|
|                                                                                               | Phenotype          | Genetic loci |             | Phenotype          | Genetic loci     | Phenotype          | Genetic loci                                   |
|                                                                                               |                    | <i>katG</i>  | <i>inhA</i> |                    |                  |                    |                                                |
| <b>Isoniazid-resistant strains</b>                                                            |                    |              |             |                    |                  |                    |                                                |
| 186133                                                                                        | R                  | wt           | C-15T       | S                  | wt               | R                  | wt                                             |
| 186136                                                                                        | R                  | wt           | C-15T       | S                  | wt               | R                  | wt (R245R)                                     |
| 179932                                                                                        | R                  | wt           | C-15T       | S                  | wt               | R                  | wt                                             |
| 500090                                                                                        | R                  | S315T1       | wt          | S                  | wt               | R                  | bp 637 and 638 del,<br>stop at aa pos. 317     |
| <b>Multidrug-resistant strains (<i>katG</i> -mutation)</b>                                    |                    |              |             |                    |                  |                    |                                                |
| 295                                                                                           | R                  | S315T1       | wt          | R                  | S531L            | R                  | L478R                                          |
| 130                                                                                           | R                  | S315T1       | wt          | R                  | S531L            | R                  | bp 1054 del,<br>stop at aa pos.372             |
| 177836                                                                                        | R                  | S315T1       | wt          | R                  | S531L            | R                  | S266R &<br>bp 1047 del,<br>stop at aa pos. 372 |
| 186038                                                                                        | R                  | S315T1       | wt          | R                  | S531L            | R                  | W256Stop                                       |
| 186137                                                                                        | R                  | S315T1       | wt          | R                  | S531L            | R                  | bp 8 del,<br>stop at aa pos. 62                |
| 176231                                                                                        | R                  | S315T1       | wt          | R                  | S531L            | R                  | S266R &<br>bp 1047 del,<br>stop at aa pos. 372 |
| 186071                                                                                        | R                  | S315T1       | wt          | R                  | S531L            | R                  | A-7G                                           |
| 186075                                                                                        | R                  | S315T1       | wt          | R                  | H526D            | R                  | N298T                                          |
| 186033                                                                                        | R                  | S315T1       | wt          | R                  | S531L            | R                  | S266R &<br>bp 849 del,<br>stop at aa pos. 313  |
| 186032                                                                                        | R                  | S315T1       | wt          | R                  | H526Y            | R                  | L229R                                          |
| 186003                                                                                        | R                  | S315T1       | wt          | R                  | S531L            | R                  | bp 107 del,<br>stop at aa pos. 62              |
| 186014                                                                                        | R                  | S315T1       | wt          | R                  | S531L            | R                  | M1R                                            |
| <b>Multidrug-resistant strains (<i>inhA</i> -promoter mutation)</b>                           |                    |              |             |                    |                  |                    |                                                |
| 179                                                                                           | R                  | wt           | C-15T       | R                  | S531L &<br>D516Y | R                  | wt                                             |
| 181783                                                                                        | R                  | wt           | C-15T       | R                  | S531L            | R                  | P192S                                          |
| 186110                                                                                        | R                  | wt           | C-15T       | R                  | S531L            | R                  | wt                                             |
| 176743                                                                                        | R                  | wt           | C-15T       | R                  | S531L            | R                  | P192S                                          |
| 181976                                                                                        | R                  | wt           | C-15T       | R                  | S531L            | R                  | P192S                                          |
| <b>Multidrug-resistant strains (<i>katG</i> -mutation and <i>inhA</i> -promoter mutation)</b> |                    |              |             |                    |                  |                    |                                                |
| 1703                                                                                          | R                  | S315T1       | T-8C        | R                  | H526Y            | R                  | F431L                                          |
| 186044                                                                                        | R                  | S315T1       | C-15T       | R                  | H526D            | R                  | wt                                             |
| 186025                                                                                        | R                  | S315T1       | C-15T       | R                  | S531L            | R                  | H281P                                          |
| 186031                                                                                        | R                  | S315T1       | C-15T       | R                  | S531L            | R                  | S15P                                           |
